# Supplementary material for: Assessment of Physicochemical, Macro- and Microelements, Heavy Metals, and Related Human Health Risk from Organically, Conventionally, and Homemade Romanian Wines
Source: MDPI journal article supplement (doi:10.3390/horticulturae8050382), 2022-04-27
Supplement: s1 [file s1]

## Supplementary material

**Table S1. Vineyard geographical location, varieties, and the types of analyzed wine**

| Area of production      | Grape variety  | Type of wine | Variety origin | Vintage | Number of samples (org./conv./homew.) |
|-------------------------|----------------|--------------|----------------|---------|---------------------------------------|
| <b>Dealul Bujorului</b> | Wine sample 1  | White        | Native         | 2019    | 3 (0/3/0)                             |
|                         | Wine sample 2  | White        | Native         | 2019    | 4 (0/2/2)                             |
|                         | Wine sample 3  | White        | International  | 2019    | 4 (0/2/2)                             |
|                         | Wine sample 4  | White        | Native         | 2019    | 3 (0/3/0)                             |
|                         | Wine sample 5  | White        | Native         | 2019    | 3 (0/3/0)                             |
|                         | Wine sample 6  | White        | International  | 2019    | 2 (0/2/0)                             |
|                         | Wine sample 7  | Red          | Native         | 2018    | 3 (0/3/0)                             |
|                         | Wine sample 8  | Red          | International  | 2018    | 8 (3/3/2)                             |
|                         | Wine sample 9  | Red          | Native         | 2018    | 3 (0/3/0)                             |
|                         | Wine sample 10 | Red          | International  | 2019    | 2 (0/2/0)                             |
|                         | N/A 1          | White        | -              | 2019    | 3 (0/0/3)                             |
|                         | N/A 2          | Red          | -              | 2019    | 2 (0/0/2)                             |
|                         | N/A 3          | Rosé         | -              | 2019    | 7 (2/2/3)                             |
| <b>Târnava</b>          | Wine sample 1  | White        | Native         | 2017    | 7 (3/2/2)                             |
|                         | Wine sample 2  | White        | Native         | 2017    | 8 (3/3/2)                             |
|                         | Wine sample 3  | White        | International  | 2018    | 4 (2/2/0)                             |
|                         | Wine sample 4  | White        | International  | 2018    | 2 (0/2/0)                             |
|                         | Wine sample 5  | White        | International  | 2019    | 2 (0/2/0)                             |
|                         | Wine sample 6  | White        | International  | 2019    | 2 (0/2/0)                             |
|                         | Wine sample 7  | White        | International  | 2018    | 2 (0/2/0)                             |
|                         | N/A 1          | White        | -              | 2019    | 3 (0/0/3)                             |
|                         | N/A 2          | White        | -              | 2019    | 3 (0/0/3)                             |
|                         | N/A 3          | White        | -              | 2019    | 3 (0/0/3)                             |
| <b>Murfatlar</b>        | Wine sample 1  | Red          | International  | 2017    | 10 (5/5/0)                            |
|                         | Wine sample 2  | Red          | International  | 2017    | 6 (3/3/0)                             |
|                         | Wine sample 3  | Red          | Native         | 2018    | 5 (3/2/0)                             |
|                         | Wine sample 4  | White        | International  | 2018    | 6 (4/2/0)                             |
|                         | N/A 1          | White        | -              | 2018    | 3 (0/0/3)                             |
|                         | N/A 2          | Red          | -              | 2018    | 3 (0/0/3)                             |
| <b>Cotnari</b>          | Wine sample 1  | White        | Native         | 2017    | 7 (2/3/2)                             |
|                         | Wine sample 2  | White        | Native         | 2017    | 8 (2/3/3)                             |
|                         | Wine sample 3  | White        | International  | 2017    | 3 (0/3/0)                             |
|                         | Wine sample 4  | White        | Native         | 2017    | 9 (3/2/4)                             |
|                         | Wine sample 5  | White        | International  | 2017    | 2 (0/2/0)                             |
|                         | Wine sample 6  | White        | International  | 2017    | 1 (0/1/0)                             |
|                         | N/A 1          | White        | -              | 2017    | 3 (0/0/3)                             |
| <b>Sarica Niculițel</b> | Wine sample 1  | White        | International  | 2018    | 7 (4/3/0)                             |
|                         | Wine sample 2  | White        | International  | 2018    | 4 (2/2/0)                             |
|                         | Wine sample 3  | Red          | International  | 2019    | 9 (3/3/3)                             |
|                         | Wine sample 4  | Red          | International  | 2018    | 5 (2/1/2)                             |
|                         | N/A 1          | White        | -              | 2018    | 4 (2/0/2)                             |
|                         | N/A 2          | White        | -              | 2018    | 4 (1/0/3)                             |
| <b>Panciu</b>           | Wine sample 1  | White        | International  | 2018    | 5 (2/1/2)                             |
|                         | Wine sample 2  | White        | International  | 2018    | 5 (2/2/1)                             |

| Area of production        | Grape variety | Type of wine | Variety origin | Vintage | Number of samples (org./conv./homew.) |
|---------------------------|---------------|--------------|----------------|---------|---------------------------------------|
|                           | Wine sample 3 | Red          | International  | 2019    | 3 (2/1/0)                             |
|                           | Wine sample 4 | Red          | International  | 2019    | 2 (1/1/0)                             |
|                           | N/A 1         | White        | -              | 2019    | 1 (0/0/1)                             |
|                           | N/A 2         | Red          | -              | 2019    | 1 (0/0/1)                             |
| <b>Huși</b>               | Wine sample 1 | White        | Native         | 2019    | 2 (0/2/0)                             |
|                           | Wine sample 2 | White        | Native         | 2019    | 3 (2/1/0)                             |
|                           | Wine sample 3 | Red          | Native         | 2018    | 1 (0/1/0)                             |
|                           | Wine sample 4 | White        | International  | 2019    | 2 (0/2/0)                             |
|                           | Wine sample 5 | Red          | International  | 2019    | 1 (0/1/0)                             |
|                           | N/A 1         | White        | -              | 2018    | 1 (0/0/1)                             |
|                           | N/A 2         | Red          | -              | 2018    | 1 (0/0/1)                             |
| <b>Drăgășani</b>          | Wine sample 1 | White        | Native         | 2019    | 6 (2/2/2)                             |
|                           | Wine sample 2 | White        | International  | 2019    | 2 (0/2/0)                             |
|                           | Wine sample 3 | Red          | International  | 2019    | 2 (0/2/0)                             |
|                           | N/A 1         | White        | -              | 2019    | 2 (0/0/2)                             |
| <b>Halmeu Wine Center</b> | Wine sample 1 | White        | Native         | 2018    | 6 (2/2/2)                             |
|                           | Wine sample 2 | White        | International  | 2018    | 2 (0/2/0)                             |
|                           | Wine sample 3 | White        | International  | 2018    | 2 (0/2/0)                             |
|                           | Wine sample 4 | White        | International  | 2019    | 1 (0/1/0)                             |
|                           | N/A 1         | White        | -              | 2019    | 6 (0/0/6)                             |

N/A = the vine variety cannot be established with certainty (only in the case of homemade wine); the total number of samples of wines = 239

**Table S2. Instrumental conditions for the determination of each element using the ICP-MS technique**

| Element | Correlation coefficient | LoD (µg/L) | LoQ (µg/L) | BEC (µg/L) | Element | Correlation coefficient | LoD (µg/L) | LoQ (µg/L) | BEC (µg/L) |
|---------|-------------------------|------------|------------|------------|---------|-------------------------|------------|------------|------------|
| Ag      | 0.9990                  | 0.018      | 0.166      | 0.017      | K       | 0.9991                  | 2.847      | 7.321      | 31.733     |
| Al      | 0.9992                  | 0.068      | 0.324      | 6.002      | Li      | 0.9992                  | 0.005      | 0.032      | 0.020      |
| As      | 0.9994                  | 0.212      | 0.704      | 0.536      | Mg      | 0.9999                  | 2.054      | 9.003      | 9.099      |
| Ba      | 0.9999                  | 0.879      | 3.574      | 2.684      | Mn      | 0.9997                  | 0.012      | 0.039      | 0.087      |
| Be      | 0.9999                  | 0.006      | 0.020      | 0.015      | Na      | 0.9996                  | 3.991      | 13.232     | 32.121     |
| Bi      | 0.9999                  | 0.009      | 0.030      | 0.002      | Ni      | 0.9997                  | 0.045      | 0.181      | 0.096      |
| Ca      | 0.9995                  | 5.384      | 17.986     | 21.004     | Pb      | 0.9996                  | 0.151      | 0.230      | 0.653      |
| Cd      | 0.9993                  | 0.029      | 0.069      | 0.032      | Rb      | 0.9997                  | 0.002      | 0.006      | 0.008      |
| Co      | 0.9997                  | 0.051      | 0.136      | 0.152      | Se      | 0.9996                  | 0.533      | 1.641      | 0.923      |
| Cr      | 0.9999                  | 1.607      | 5.533      | 0.637      | Sr      | 0.9997                  | 0.133      | 0.476      | 0.957      |
| Cs      | 0.9999                  | 0.006      | 0.021      | 0.015      | Tl      | 0.9996                  | 0.002      | 0.007      | 0.003      |
| Cu      | 0.9998                  | 0.035      | 0.139      | 0.236      | V       | 0.9994                  | 1.208      | 4.042      | 4.263      |
| Fe      | 0.9998                  | 5.232      | 17.574     | 71.426     | U       | 0.9998                  | 0.031      | 0.084      | 0.005      |
| Ga      | 0.9997                  | 0.013      | 0.041      | 0.041      | Zn      | 0.9999                  | 0.355      | 1.203      | 5.402      |
| In      | 0.9998                  | 0.004      | 0.011      | 0.009      | Hg      | 0.9999                  | 0.043      | 0.137      | 0.128      |

LoD = Detection limit; LoQ = Quantification limit; BEC = Background equivalent concentration.

**Table S3. Working parameters for MIURA ONE I.S.E. S.r.L.**

| Parameter                 | Absorbance (nm) | Incubation temperature (°C) | Incubation time (min.) | Detection limit (g/L) / (mg/L) | Correlation coefficient (r <sup>2</sup> ) | Method linearity (g/L) / (mg/L) |
|---------------------------|-----------------|-----------------------------|------------------------|--------------------------------|-------------------------------------------|---------------------------------|
| Free SO <sub>2</sub>      | 560             | 37                          | 10                     | 3 mg/                          | 0.9999                                    | 150 mg/L                        |
| Total SO <sub>2</sub>     | 405             | 37                          | 5                      | 3 mg/L                         | 0.9999                                    | 400 mg/L                        |
| Pyruvic acid (mg/L)       | 340             | 37                          | 1                      | 6 mg/L                         | 0.9996                                    | 400 mg/L                        |
| Acetaldehyde (mg/L)       | 340             | 37                          | 2                      | 0.1 mg/L                       | 0.9994                                    | 200 mg/L                        |
| Amino acid (g/L)          | 340             | 37                          | 5                      | 0.3 mg/L                       | 0.9990                                    | 250 mg/L                        |
| D (-) gluconic acid (g/L) | 340             | 37                          | 5                      | 0.250 g/L                      | 0.9996                                    | 0.004 mg/L                      |
| L (+) lactic acid (g/L)   | 340             | 37                          | 10                     | 0.02 g/L                       | 0.9999                                    | 3.00 g/L                        |
| D (-) lactic acid (g/L)   | 340             | 37                          | 5                      | 0.250 g/L                      | 0.9999                                    | 0.004 g/L                       |
| Acetic acid (g/L)         | 340             | 37                          | 10                     | 0.03 g/L                       | 0.9999                                    | 1.30 g/L                        |
| Tartaric acid (g/L)       | 492             | 37                          | 15                     | 0.80 g/L                       | 0.9999                                    | 0.4 g/L                         |
| L (-) malic acid (g/L)    | 340             | 37                          | 5                      | 0.5 g/L                        | 0.9999                                    | 0.025 g/L                       |
| Glycerol (g/L)            | 500             | 37                          | 5                      | 0.01 g/L                       | 0.9999                                    | 1.00 g/L                        |

Filtered samples are decolorated using 1 g PVPP/100 mL wine samples

PVPP = Polyvinylpyrrolidone.

**Table S4. The program of the microwave oven Milestone START D Microwave Digestion System**

| Step | Target Temp<br>(°C) | Pressure Max.<br>(psi) | Temperature<br>Ramp<br>(min.) | Hold Time<br>(min.) | Power<br>(%) |
|------|---------------------|------------------------|-------------------------------|---------------------|--------------|
| 1.   | 220                 | 800                    | 10                            | 20                  | 100          |
| 2.   | 220                 | 800                    | 10                            | 15                  | 60           |
| 3.   | 35-40               | 800                    | -                             | 45 min.<br>cooling  | -            |

**Table S5. Instrumental (a) and data acquisition (b) parameters of ICP-MS**

| (a) Instrumental parameters               |             | (b) Data acquisition parameters for quantitative mode |                                                          |
|-------------------------------------------|-------------|-------------------------------------------------------|----------------------------------------------------------|
| RF power/W                                | 1.4 kW      | Measuring mode                                        | Standard (Ar 5.0)<br>Q Cell (Collision Cell)<br>(He 6.0) |
| Argon (Ar) gas flow, Helium (He) gas flow |             | Point per peak                                        | 3                                                        |
| Nebulizer                                 | 1.0 L/min.  | Scans/Replicate                                       | 7                                                        |
| Plasma gas flow rate<br>(Ar 5.0)          | 18.0 L/min. | Replicate/Sample                                      | 7                                                        |
| Auxiliary gas flow rate<br>(He 6.0)       | 0.20 L/min. |                                                       |                                                          |
| Lens voltage                              | 37 V        | Dwell time (ms)                                       | 3                                                        |
| Mirror lens right                         | 32 V        |                                                       |                                                          |
| Mirror lens bottom                        | 31 V        |                                                       |                                                          |
| Sample uptake rate                        | 90 s        | Integration time                                      | 1-5 ms                                                   |
| Temperature spray chamber                 |             | 2.10 °C                                               |                                                          |
| Background correction                     |             | 2 points/peak                                         |                                                          |
| Injector tube                             |             | quartz 2-mm id                                        |                                                          |
| Sample cone                               |             | Sample Cone 4450                                      |                                                          |
| Skimmer cone                              |             | Ni – Skimmer iCAP Q 0.5 mm insert version             |                                                          |
| Nebulizer                                 |             | MicroMist Nebulizer 0.4 mL/min.                       |                                                          |

**Table S6. Physicochemical analyses of wine samples (average values)**

| Wine samples /<br>Parameters | Organic | Conventional | Homemade | Organic +<br>Conventional |
|------------------------------|---------|--------------|----------|---------------------------|
| ALC                          | 13.57   | 13.22        | 11.38    | 13.40                     |
| TA                           | 5.54    | 5.67         | 5.91     | 5.60                      |
| VA                           | 0.43    | 0.47         | 0.58     | 0.45                      |
| RS                           | 3.03    | 2.66         | 15.24    | 2.84                      |
| DM                           | 21.03   | 20.90        | 19.24    | 20.96                     |
| pH                           | 3.39    | 3.43         | 3.47     | 3.41                      |
| TPH                          | 719.82  | 712.42       | 693.06   | 716.12                    |
| ANT                          | 43.43   | 44.04        | 41.81    | 43.73                     |
| ACA                          | 0.29    | 0.30         | 0.33     | 0.31                      |
| AMA                          | 0.77    | 0.64         | 0.64     | 0.72                      |
| TAA                          | 3.47    | 3.14         | 3.08     | 3.31                      |
| LLA                          | 0.64    | 0.65         | 0.67     | 0.64                      |
| DLA                          | 0.18    | 0.17         | 0.18     | 0.17                      |
| LMA                          | -       | -            | 1.85     | -                         |
| DGA                          | 0.23    | 0.20         | 0.19     | 0.21                      |
| PA                           | 80.18   | 79.21        | 75.69    | 79.69                     |
| G                            | 6.17    | 6.02         | 5.95     | 6.09                      |
| ACDE                         | 48.60   | 55.49        | 65.71    | 52.04                     |
| OD (420 nm)                  | 1.56    | 1.54         | 1.37     | 1.55                      |
| OD (520 nm)                  | 2.35    | 2.32         | 2.02     | 2.33                      |
| OD (620 nm)                  | 0.54    | 0.47         | 0.38     | 0.50                      |
| CI                           | 4.44    | 4.33         | 3.77     | 4.39                      |
| Hue                          | 0.44    | 0.45         | 0.45     | 0.46                      |

ALC = alcohol strength (vol. %); TA = titratable acidity (g tartaric acid/L); VA = volatile acidity (g acetic acid/L); RS = reducing sugars (g/L); DM = total dry matter (g/L); TPH = total phenolics (mg gallic acid/L); ANT = anthocyanins (mg malvidin-3-glucoside/L); ACA = acetic acid (g/L); AMA = amino acid (g/L); TAA = tartaric acid (g/L); LLA = L (+) lactic acid (g/L); DLA = D (-) lactic acid (g/L); LMA = L (-) malic acid (g/L); DGA = D (-) gluconic acid (g/L); PA = pyruvic acid (mg/L); G = glycerol (g/L); ACDE = acetaldehyde (mg/L); DO 420 = optical density at 420 nm using 1 cm quartz tub (AU); DO 520 = optical density at 520 nm using 1 cm quartz tub (AU); DO 620 = optical density at 520 nm using 1 cm quartz tub (AU); CI = color intensity (420+520+620 nm) (AU).

**Table S7. Maximum SO<sub>2</sub> concentration depending on wine type, EU regulation<sup>1</sup> and O.I.V. recommendation<sup>2</sup> (mg/L)**

| 1. EU regulation no: 1493/1999 and 1622/2000, modified in 1655/2001 [108]                                                                                                                                                                                                                                                                                                                                                                                                           |                          |                          |
|-------------------------------------------------------------------------------------------------------------------------------------------------------------------------------------------------------------------------------------------------------------------------------------------------------------------------------------------------------------------------------------------------------------------------------------------------------------------------------------|--------------------------|--------------------------|
| Type of wine                                                                                                                                                                                                                                                                                                                                                                                                                                                                        | Sugar content<br>< 5 g/L | Sugar content<br>≥ 5 g/L |
| Red wines                                                                                                                                                                                                                                                                                                                                                                                                                                                                           | 160 (+ 40)*              | 210 (+ 40)*              |
| White and rozé                                                                                                                                                                                                                                                                                                                                                                                                                                                                      | 210 (+ 40)*              | 260 (+ 40)*              |
| Red <i>vins de pays</i>                                                                                                                                                                                                                                                                                                                                                                                                                                                             | 125                      | 150                      |
| White and rozé <i>vins de pays</i>                                                                                                                                                                                                                                                                                                                                                                                                                                                  | 150                      | 175                      |
| Dessert wines                                                                                                                                                                                                                                                                                                                                                                                                                                                                       | 150                      | 200                      |
| <i>Vins de pays</i> (TAV > 15 % vol. ; sugar > 45 g/L)                                                                                                                                                                                                                                                                                                                                                                                                                              |                          |                          |
| White AOC wines<br>Bordeaux superieur, Graves de Vayres, Côtes de Bordeaux<br>Saint-Macaire, Premieres Côtes de Bordeaux, Saint-Floy<br>Bordeaux, Côtes de Bergerac suivie ou non de la denomination<br>Côtes de Saussignac, Haut Montravel, Côtes de Montravel et Rosette,<br>Gaillac                                                                                                                                                                                              |                          |                          |
| White DO wines<br>Allela, La Mancha, Navarra, Penedes, Rioja, Reuda, Tarragona et<br>Valencia<br>Alto Adige, Trentino „passito” „dendemmia tardiva”                                                                                                                                                                                                                                                                                                                                 |                          |                          |
| Vqprd Moscato di Pandelleria naturale and Moscato di Pantelleria<br>United Kingdom Vqprd describes as follows:<br>botrytis, noble harvest, noble late harvested                                                                                                                                                                                                                                                                                                                     |                          |                          |
| German wines                                                                                                                                                                                                                                                                                                                                                                                                                                                                        |                          |                          |
| Spätlese                                                                                                                                                                                                                                                                                                                                                                                                                                                                            |                          | 300                      |
| Auslese and some Rumanian white wines                                                                                                                                                                                                                                                                                                                                                                                                                                               |                          | 350                      |
| Berrenauslese, Ausbruch, Ausbruch-wein, Trockenbeerenauslese,<br>Elswein                                                                                                                                                                                                                                                                                                                                                                                                            |                          | 400                      |
| White AOC wines<br>Sauternes, Barsac, Cadillac, Cérons, Louplac,<br>Sainte-Croix-du-Mont, Graves supérieurs, Monbazillac,<br>Jurançon, Pacherenc du Vic Bilh. Anjou-Coteaux de la Loire,<br>Bonnezeaux, Quarts de Chaume, Coteau de l'Aubange,<br>Coteaux du Layon, suivi du nom de la commune d'origine,<br>Coteaux du Layon, suivi du nom de Chauma, Coteaux de Saumar,<br>Alsace et Alsace grand cru suivi de la mention „vendanges tardives”<br>ou „selection de grains nobles” |                          |                          |
| Sweet wines from Greece (sugar ≥ 45 g/L)                                                                                                                                                                                                                                                                                                                                                                                                                                            |                          |                          |
| Samos, Rhodes, Patras, Rio Patron, Cephalonie, Limnos, Sitia,<br>Santorin, Néméa, Daphines                                                                                                                                                                                                                                                                                                                                                                                          |                          |                          |
| Certain Canadian white wines (e.g., icewine)                                                                                                                                                                                                                                                                                                                                                                                                                                        |                          | 400                      |
| 2. O.I.V. – maxim acceptable limits: International Code of Winemaking Practices and Collection of International Wine Analysis Methods, 2001 [109]                                                                                                                                                                                                                                                                                                                                   |                          |                          |
| Type of wine                                                                                                                                                                                                                                                                                                                                                                                                                                                                        | Sugar content<br>< 5 g/L | Sugar content<br>≥ 5 g/L |
| Red wine                                                                                                                                                                                                                                                                                                                                                                                                                                                                            | 150                      | 300                      |
| White and rozé wine                                                                                                                                                                                                                                                                                                                                                                                                                                                                 | 200                      | 300                      |
| Certain sweet white wine                                                                                                                                                                                                                                                                                                                                                                                                                                                            |                          | 400                      |

AOC = Appellation d'Origine Contrôlée; DO = Designation of Origin; <sup>1</sup>Council Regulation (EC). Available online: [https://www.fsai.ie/uploadedfiles/Consol\\_Reg1493\\_1999.pdf](https://www.fsai.ie/uploadedfiles/Consol_Reg1493_1999.pdf) (Accessed on 28 Aug 2021); <sup>2</sup>International

Organization of Vine and Wine. International code of oenological practices. Available online:  
<https://www.oiv.int/public/medias/7713/en-oiv-code-2021.pdf> (Accessed on 28 Aug 2021).

\* When required due to weather conditions in certain vineyard areas.

**Table S8. Mean concentration of SO<sub>2</sub> (free and total) from organic (org.), conventional (conv.), and homemade (homew.) wine samples (average values)**

| Wine samples /<br>Parameters | Org   | Conv   | Home  | Org + Conv |
|------------------------------|-------|--------|-------|------------|
| Free SO <sub>2</sub>         | 16.00 | 20.18  | 11.22 | 18.09      |
| Total SO <sub>2</sub>        | 88.23 | 129.39 | 98.35 | 108.81     |

**Table S9. Mean concentration of elements in organic (org.), conventional (conv.), and homemade (homew.) wine samples (average values)**

| Wine samples /<br>Element            | Org     | Conv    | Home    | Org + Conv |
|--------------------------------------|---------|---------|---------|------------|
| <sup>23</sup> Na (mg/L)              | 35.14   | 36.11   | 43.26   | 35.63      |
| <sup>24</sup> Mg (g/L)               | 97.24   | 105.01  | 114.87  | 101.13     |
| <sup>43</sup> Ca (mg/L)              | 44.01   | 48.14   | 43.62   | 46.01      |
| <sup>19</sup> K (mg/L)               | 599.66  | 607.84  | 565.08  | 603.75     |
| <sup>7</sup> Li (µg/L)               | 15.13   | 14.72   | 14.66   | 14.93      |
| <sup>64</sup> Cu (mg/L)              | 0.33    | 0.39    | 0.37    | 0.37       |
| <sup>55</sup> Mn (mg/L)              | 0.54    | 0.67    | 0.62    | 0.61       |
| <sup>56</sup> Fe (mg/L)              | 0.91    | 1.58    | 0.94    | 1.26       |
| <sup>27</sup> Al (µg/L)              | 316.00  | 347.09  | 252.53  | 331.55     |
| <sup>52</sup> Cr (µg/L)              | 338.57  | 341.63  | 345.23  | 339.76     |
| <sup>59</sup> Co (µg/L)              | 6.22    | 7.40    | 7.43    | 6.81       |
| <sup>60</sup> Ni (µg/L)              | 52.91   | 51.99   | 41.83   | 52.45      |
| <sup>65</sup> Zn <sup>1</sup> (µg/L) | 2551.29 | 2832.64 | 2501.88 | 2691.96    |
| <sup>51</sup> V (µg/L)               | 210.86  | 206.58  | 214.80  | 208.72     |
| <sup>108</sup> Ag (µg/L)             | 2.29    | 2.68    | 2.35    | 2.49       |
| <sup>75</sup> As (µg/L)              | < LOQ   | < LOQ   | < LOQ   | -          |
| <sup>9</sup> Be (µg/L)               | 1.31    | 1.41    | 1.25    | 1.36       |
| <sup>209</sup> Bi (µg/L)             | 6.60    | 8.32    | 1.70    | 7.56       |
| <sup>133</sup> Cs (µg/L)             | 4.10    | 4.70    | 3.82    | 4.40       |
| <sup>137</sup> Ba (µg/L)             | 237.65  | 265.88  | 278.39  | 251.77     |
| <sup>70</sup> Ga (µg/L)              | 1.73    | 1.83    | 1.81    | 1.78       |
| <sup>115</sup> In (µg/L)             | < LOQ   | < LOQ   | < LOQ   | -          |
| <sup>88</sup> Sr (µg/L)              | 574.56  | 592.26  | 587.05  | 583.41     |
| <sup>85</sup> Rb (µg/L)              | 875.20  | 881.14  | 894.30  | 878.17     |
| <sup>79</sup> Se (µg/L)              | 4.40    | 6.28    | 5.16    | 5.34       |
| <sup>204</sup> Tl (µg/L)             | 0.54    | 0.59    | 0.44    | 0.57       |
| <sup>111</sup> Cd (µg/L)             | 0.25    | 0.53    | 0.40    | 0.39       |
| <sup>208</sup> Pb (µg/L)             | 28.87   | 35.83   | 31.01   | 32.35      |
| <sup>201</sup> Hg (µg/L)             | < LOQ   | < LOQ   | < LOQ   | -          |
| <sup>238</sup> U (µg/L)              | < LOQ   | < LOQ   | < LOQ   | -          |

Average value ± standard deviation. M.P.L. (Maximum Permissible Limit) for Na 60 mg/L; M.P.L. for Cu 1 mg/L; M.P.L. for Zn 5 mg/L; M.P.L. for As 0.2 mg/L; M.P.L. for Cd 0.01 mg/L; M.P.L. for Pb 0.15 mg/L. LOQ = Limit of Quantitation (lower than the limit of quantification); LOQ for As 0.7776 µg/L; LOQ for Be 0.0030 µg/L; LOQ for Bi 0.0223 µg/L; LOQ for Cs 0.0040 µg/L; LOQ for Ga 0.035 µg/L; LOQ for In 0.010 µg/L; LOQ for Tl 0.006 µg/L; LOQ for Cd 0.067 µg/L; LOQ for Pb 0.0053 µg/L; LOQ for Hg 0.137 µg/L; LOQ for U 0.084 µg/L.

**Table S10. Concentration (Mean  $\pm$  standard deviation) of elements in wine samples from Dealu Bujorului, Târnavă, and Murfatlar vineyards**

| Location                 | Dealu Bujorului Vineyard |                      |                      | Târnavă Vineyard    |                     |                     | Murfatlar Vineyard   |                      |                      |
|--------------------------|--------------------------|----------------------|----------------------|---------------------|---------------------|---------------------|----------------------|----------------------|----------------------|
| Element                  | Org                      | Conv                 | Home                 | Org                 | Conv                | Home                | Org                  | Conv                 | Home                 |
| <sup>23</sup> Na (mg/L)  | 36.58 $\pm$ 10.95        | 35.83 $\pm$ 9.69     | 41.34 $\pm$ 10.49    | 54.20 $\pm$ 1.01    | 57.33 $\pm$ 0.77    | 57.29 $\pm$ 3.33    | 49.44 $\pm$ 3.10     | 52.88 $\pm$ 0.16     | 62.05 $\pm$ 3.56     |
| <sup>24</sup> Mg (mg/L)  | 104.05 $\pm$ 15.45       | 118.96 $\pm$ 21.35   | 127.93 $\pm$ 11.30   | 100.73 $\pm$ 4.49   | 116.40 $\pm$ 2.02   | 108.07 $\pm$ 1.82   | 79.45 $\pm$ 12.92    | 110.00 $\pm$ 20.90   | 92.22 $\pm$ 5.20     |
| <sup>43</sup> Ca (mg/L)  | 55.13 $\pm$ 23.59        | 60.31 $\pm$ 21.22    | 52.57 $\pm$ 23.29    | 48.62 $\pm$ 5.45    | 45.03 $\pm$ 1.28    | 44.82 $\pm$ 0.79    | 50.91 $\pm$ 14.03    | 54.54 $\pm$ 13.88    | 52.28 $\pm$ 3.90     |
| <sup>19</sup> K (mg/L)   | 625.38 $\pm$ 238.34      | 611.22 $\pm$ 219.92  | 570.00 $\pm$ 252.76  | 267.78 $\pm$ 11.14  | 287.16 $\pm$ 2.65   | 334.22 $\pm$ 9.94   | 533.88 $\pm$ 237.65  | 533.64 $\pm$ 235.89  | 520.66 $\pm$ 113.96  |
| <sup>7</sup> Li (μg/L)   | 12.39 $\pm$ 5.25         | 13.11 $\pm$ 3.39     | 15.97 $\pm$ 5.87     | 8.82 $\pm$ 0.45     | 8.64 $\pm$ 3.47     | 9.08 $\pm$ 0.28     | 9.92 $\pm$ 1.94      | 9.62 $\pm$ 3.18      | 10.59 $\pm$ 1.00     |
| <sup>64</sup> Cu (mg/L)  | 0.33 $\pm$ 0.22          | 0.34 $\pm$ 0.20      | 0.39 $\pm$ 0.16      | 0.66 $\pm$ 0.03     | 0.70 $\pm$ 0.07     | 0.55 $\pm$ 0.10     | 0.47 $\pm$ 0.20      | 0.49 $\pm$ 0.20      | 0.42 $\pm$ 0.13      |
| <sup>55</sup> Mn (mg/L)  | 0.45 $\pm$ 0.26          | 0.61 $\pm$ 0.32      | 0.55 $\pm$ 0.29      | 0.26 $\pm$ 0.06     | 0.34 $\pm$ 0.02     | 0.51 $\pm$ 0.06     | 0.19 $\pm$ 0.06      | 0.18 $\pm$ 0.05      | 0.17 $\pm$ 0.04      |
| <sup>56</sup> Fe (mg/L)  | 0.97 $\pm$ 0.49          | 2.18 $\pm$ 1.08      | 1.19 $\pm$ 0.23      | 0.95 $\pm$ 0.07     | 1.23 $\pm$ 0.02     | 0.61 $\pm$ 0.11     | 0.86 $\pm$ 0.20      | 1.15 $\pm$ 0.13      | 0.83 $\pm$ 0.41      |
| <sup>27</sup> Al (μg/L)  | 229.09 $\pm$ 75.88       | 280.81 $\pm$ 129.11  | 205.87 $\pm$ 53.52   | 118.12 $\pm$ 7.69   | 156.03 $\pm$ 8.62   | 169.52 $\pm$ 18.31  | 448.15 $\pm$ 208.68  | 596.78 $\pm$ 83.25   | 394.48 $\pm$ 78.24   |
| <sup>52</sup> Cr (μg/L)  | 238.45 $\pm$ 72.51       | 260.10 $\pm$ 59.46   | 344.35 $\pm$ 120.74  | 531.29 $\pm$ 30.36  | 536.33 $\pm$ 11.25  | 672.93 $\pm$ 14.68  | 599.76 $\pm$ 250.94  | 539.37 $\pm$ 277.54  | 592.69 $\pm$ 344.94  |
| <sup>59</sup> Co (μg/L)  | 8.23 $\pm$ 2.91          | 7.80 $\pm$ 2.79      | 8.15 $\pm$ 2.06      | 3.56 $\pm$ 0.87     | 3.39 $\pm$ 0.09     | 7.01 $\pm$ 2.08     | 3.55 $\pm$ 0.18      | 3.88 $\pm$ 3.43      | 4.70 $\pm$ 2.70      |
| <sup>60</sup> Ni (μg/L)  | 36.92 $\pm$ 13.24        | 33.58 $\pm$ 16.84    | 23.46 $\pm$ 7.99     | 56.77 $\pm$ 8.50    | 68.46 $\pm$ 3.99    | 24.45 $\pm$ 12.57   | 32.41 $\pm$ 16.59    | 28.54 $\pm$ 8.82     | 23.94 $\pm$ 11.62    |
| <sup>65</sup> Zn (mg/L)  | 2436.88 $\pm$ 657.67     | 2880.66              | 2201.10 $\pm$ 546.38 | 2935.70 $\pm$ 59.86 | 4493.00 $\pm$ 46.63 | 3521.26 $\pm$ 77.03 | 1507.70 $\pm$ 278.17 | 1757.18 $\pm$ 228.83 | 1779.50 $\pm$ 562.62 |
| <sup>51</sup> V (μg/L)   | 145.63 $\pm$ 30.56       | 157.22 $\pm$ 21.78   | 153.47 $\pm$ 22.20   | 429.27 $\pm$ 62.42  | 720.82 $\pm$ 58.06  | 750.29 $\pm$ 14.47  | 176.41 $\pm$ 68.52   | 187.77 $\pm$ 84.94   | 198.48 $\pm$ 64.70   |
| <sup>108</sup> Ag (μg/L) | 0.16 $\pm$ 0.08          | 0.18 $\pm$ 0.05      | 0.09 $\pm$ 0.01      | LOQ                 | 0.15 $\pm$ 0.06     | 0.41 $\pm$ 0.04     | LOQ                  | LOQ                  | LOQ                  |
| <sup>9</sup> Be (μg/L)   | 1.65 $\pm$ 0.74          | 1.10 $\pm$ 0.72      | 1.91 $\pm$ 0.23      | 0.35 $\pm$ 0.12     | 0.39 $\pm$ 0.03     | LOQ                 | 0.34 $\pm$ 0.18      | 1.14 $\pm$ 0.56      | 1.25 $\pm$ 0.41      |
| <sup>209</sup> Bi (μg/L) | 9.13 $\pm$ 5.95          | 10.37 $\pm$ 8.82     | 2.29 $\pm$ 0.85      | 10.11 $\pm$ 1.94    | 16.92 $\pm$ 10.98   | 13.74 $\pm$ 5.58    | 1.56 $\pm$ 1.15      | 2.24 $\pm$ 1.35      | 1.54 $\pm$ 0.69      |
| <sup>133</sup> Cs (μg/L) | 3.72 $\pm$ 1.62          | 2.90 $\pm$ 1.49      | 2.40 $\pm$ 0.70      | 7.77 $\pm$ 3.89     | 11.26 $\pm$ 6.50    | 13.00 $\pm$ 1.68    | 13.41 $\pm$ 5.76     | 19.04 $\pm$ 7.21     | 10.22 $\pm$ 3.97     |
| <sup>137</sup> Ba (μg/L) | 233.00 $\pm$ 71.20       | 241.94 $\pm$ 37.93   | 273.47 $\pm$ 57.98   | 173.85 $\pm$ 34.84  | 147.12 $\pm$ 18.86  | 163.81 $\pm$ 13.14  | 146.35 $\pm$ 81.47   | 118.72 $\pm$ 59.13   | 119.33 $\pm$ 65.33   |
| <sup>70</sup> Ga (μg/L)  | 1.33 $\pm$ 0.41          | 1.30 $\pm$ 0.21      | 1.44 $\pm$ 0.37      | 3.11 $\pm$ 0.02     | 3.66 $\pm$ 1.06     | 2.59 $\pm$ 0.50     | 1.50 $\pm$ 0.53      | 1.71 $\pm$ 1.00      | 1.90 $\pm$ 0.17      |
| <sup>88</sup> Sr (μg/L)  | 636.50 $\pm$ 75.94       | 648.81 $\pm$ 83.00   | 612.53 $\pm$ 94.19   | 768.95 $\pm$ 52.42  | 759.74 $\pm$ 47.75  | 734.64 $\pm$ 45.75  | 467.92 $\pm$ 23.79   | 486.50 $\pm$ 37.49   | 453.02 $\pm$ 33.22   |
| <sup>85</sup> Rb (μg/L)  | 1036.66 $\pm$ 264.12     | 1057.67 $\pm$ 201.44 | 1073.22 $\pm$ 218.09 | 774.26 $\pm$ 132.64 | 758.23 $\pm$ 50.03  | 677.33 $\pm$ 116.12 | 711.15 $\pm$ 185.93  | 727.05 $\pm$ 168.82  | 768.17 $\pm$ 166.57  |
| <sup>79</sup> Se (μg/L)  | 3.28 $\pm$ 2.76          | 3.05 $\pm$ 2.36      | 2.20 $\pm$ 1.28      | 5.05 $\pm$ 1.50     | 7.30 $\pm$ 2.37     | 4.00 $\pm$ 2.00     | LOQ                  | LOQ                  | LOQ                  |
| <sup>204</sup> Tl (μg/L) | LOQ                      | LOQ                  | LOQ                  | LOQ                 | LOQ                 | LOQ                 | 1.57 $\pm$ 1.40      | 2.10 $\pm$ 0.50      | 0.83 $\pm$ 0.44      |
| <sup>111</sup> Cd (μg/L) | 0.17 $\pm$ 0.06          | 0.33 $\pm$ 0.09      | 0.30 $\pm$ 0.09      | 0.17 $\pm$ 0.02     | 0.43 $\pm$ 0.10     | 0.33 $\pm$ 0.10     | 0.86 $\pm$ 0.24      | 0.93 $\pm$ 0.64      | 0.74 $\pm$ 0.45      |
| <sup>208</sup> Pb (μg/L) | 25.46 $\pm$ 7.54         | 31.99 $\pm$ 10.65    | 28.25 $\pm$ 16.63    | 22.87 $\pm$ 1.48    | 32.45 $\pm$ 1.25    | 35.45 $\pm$ 11.95   | 38.54 $\pm$ 9.26     | 46.28 $\pm$ 12.35    | 41.29 $\pm$ 14.26    |

Average value  $\pm$  standard deviation. M.P.L. (Maximum Permissible Limit) for Na 60 mg/L; M.P.L. for Cu 1 mg/L; M.P.L. for Zn 5 mg/L; M.P.L. for As 0.2 mg/L;

M.P.L. for Cd 0.01 mg/L; M.P.L. for Pb 0.15 mg/L. LOQ = Limit of Quantitation (lower than the limit of quantification); LOQ for As 0.7776 μg/L; LOQ for Be 0.0030 μg/L;

LOQ for Bi 0.0223 µg/L; LOQ for Cs 0.0040 µg/L; LOQ for Ga 0.035 µg/L; LOQ for In 0.010 µg/L; LOQ for Tl 0.006 µg/L; LOQ for Cd 0.067 µg/L; LOQ for Pb 0.0053 µg/L;  
LOQ for Hg 0.137 µg/L; LOQ for U 0.084 µg/L.

**Table S11. Concentration (Mean  $\pm$  standard deviation) of elements in wine samples from Cotnari, Sarica Niculiței, and Panciu vineyards**

| Location                 | Cotnari Vineyard     |                      |                      | Sarica Niculiței Vineyard |                      |                      | Panciu Vineyard      |                      |                      |
|--------------------------|----------------------|----------------------|----------------------|---------------------------|----------------------|----------------------|----------------------|----------------------|----------------------|
| Element                  | Org                  | Conv                 | Home                 | Org                       | Conv                 | Home                 | Org                  | Conv                 | Home                 |
| <sup>23</sup> Na (mg/L)  | 36.36 $\pm$ 3.63     | 42.31 $\pm$ 0.82     | 42.51 $\pm$ 2.34     | 33.57 $\pm$ 1.81          | 34.01 $\pm$ 2.96     | 39.72 $\pm$ 0.60     | 37.87 $\pm$ 7.51     | 36.36 $\pm$ 6.36     | 35.80 $\pm$ 9.80     |
| <sup>24</sup> Mg (mg/L)  | 91.36 $\pm$ 4.06     | 153.12 $\pm$ 4.36    | 132.85 $\pm$ 10.99   | 79.56 $\pm$ 11.94         | 95.51 $\pm$ 16.77    | 118.62 $\pm$ 21.39   | 79.13 $\pm$ 12.53    | 77.56 $\pm$ 7.18     | 72.75 $\pm$ 11.43    |
| <sup>43</sup> Ca (mg/L)  | 73.11 $\pm$ 3.15     | 77.03 $\pm$ 6.59     | 73.08 $\pm$ 6.63     | 39.68 $\pm$ 19.35         | 33.64 $\pm$ 12.38    | 14.71 $\pm$ 6.27     | 51.74 $\pm$ 27.73    | 57.77 $\pm$ 27.94    | 39.80 $\pm$ 18.87    |
| <sup>19</sup> K (mg/L)   | 259.72 $\pm$ 5.49    | 207.58 $\pm$ 8.39    | 311.97 $\pm$ 12.65   | 587.33 $\pm$ 320.58       | 470.65 $\pm$ 282.10  | 393.69 $\pm$ 160.32  | 657.02 $\pm$ 360.01  | 642.76 $\pm$ 355.29  | 598.96 $\pm$ 356.86  |
| <sup>7</sup> Li (μg/L)   | 12.53 $\pm$ 1.54     | 13.93 $\pm$ 2.57     | 14.26 $\pm$ 1.05     | 6.20 $\pm$ 2.27           | 12.56 $\pm$ 3.03     | 12.28 $\pm$ 4.03     | 13.95 $\pm$ 8.91     | 15.06 $\pm$ 5.69     | 12.79 $\pm$ 2.98     |
| <sup>64</sup> Cu (mg/L)  | 0.28 $\pm$ 0.05      | 0.33 $\pm$ 0.04      | 0.51 $\pm$ 0.12      | 0.60 $\pm$ 0.27           | 0.77 $\pm$ 0.13      | 0.65 $\pm$ 0.22      | 0.41 $\pm$ 0.28      | 0.34 $\pm$ 0.23      | 0.30 $\pm$ 0.26      |
| <sup>55</sup> Mn (mg/L)  | 0.41 $\pm$ 0.03      | 0.56 $\pm$ 0.05      | 0.30 $\pm$ 0.05      | 0.64 $\pm$ 0.24           | 0.64 $\pm$ 0.24      | 0.73 $\pm$ 0.22      | 0.45 $\pm$ 0.15      | 0.65 $\pm$ 0.11      | 0.54 $\pm$ 0.04      |
| <sup>56</sup> Fe (mg/L)  | 0.95 $\pm$ 0.07      | 1.72 $\pm$ 0.11      | 1.07 $\pm$ 0.14      | 0.68 $\pm$ 0.10           | 1.34 $\pm$ 0.69      | 1.11 $\pm$ 0.51      | 0.61 $\pm$ 0.44      | 0.85 $\pm$ 0.68      | 0.82 $\pm$ 0.58      |
| <sup>27</sup> Al (μg/L)  | 369.64 $\pm$ 6.53    | 420.46 $\pm$ 11.13   | 515.44 $\pm$ 17.77   | 242.11 $\pm$ 42.96        | 204.09 $\pm$ 100.86  | 128.08 $\pm$ 23.55   | 475.56 $\pm$ 272.80  | 575.71 $\pm$ 272.80  | 413.72 $\pm$ 205.64  |
| <sup>52</sup> Cr (μg/L)  | 387.38 $\pm$ 2.72    | 388.38 $\pm$ 2.72    | 301.07 $\pm$ 15.17   | 313.21 $\pm$ 103.62       | 308.45 $\pm$ 99.11   | 343.12 $\pm$ 84.34   | 474.71 $\pm$ 272.84  | 508.15 $\pm$ 232.62  | 510.85 $\pm$ 253.79  |
| <sup>59</sup> Co (μg/L)  | 3.92 $\pm$ 0.66      | 2.67 $\pm$ 0.74      | 7.63 $\pm$ 1.14      | 4.61 $\pm$ 2.80           | 4.82 $\pm$ 1.93      | 4.23 $\pm$ 2.63      | 5.12 $\pm$ 2.02      | 3.51 $\pm$ 1.49      | 4.23 $\pm$ 3.18      |
| <sup>60</sup> Ni (μg/L)  | 36.40 $\pm$ 2.45     | 47.61 $\pm$ 12.10    | 25.19 $\pm$ 6.35     | 45.62 $\pm$ 12.34         | 33.10 $\pm$ 8.56     | 19.85 $\pm$ 3.62     | 46.37 $\pm$ 34.01    | 44.28 $\pm$ 34.03    | 55.58 $\pm$ 28.88    |
| <sup>65</sup> Zn (mg/L)  | 3857.92 $\pm$ 122.23 | 3664.76 $\pm$ 109.12 | 2630.78 $\pm$ 230.80 | 1735.22 $\pm$ 511.24      | 2047.35 $\pm$ 790.05 | 2038.81 $\pm$ 665.80 | 2901.20 $\pm$ 608.41 | 3277.20 $\pm$ 795.05 | 3502.69 $\pm$ 337.51 |
| <sup>51</sup> V (μg/L)   | 203.63 $\pm$ 13.73   | 196.89 $\pm$ 17.36   | 258.84 $\pm$ 26.93   | 289.54 $\pm$ 48.60        | 228.14 $\pm$ 27.46   | 243.27 $\pm$ 50.70   | 93.20 $\pm$ 39.95    | 86.33 $\pm$ 24.16    | 88.04 $\pm$ 37.74    |
| <sup>108</sup> Ag (μg/L) | 3.71 $\pm$ 0.75      | 4.00 $\pm$ 2.40      | 0.21 $\pm$ 0.06      | LOQ                       | 0.25 $\pm$ 0.03      | 0.19 $\pm$ 0.09      | 0.21 $\pm$ 0.07      | 0.39 $\pm$ 0.11      | 0.30 $\pm$ 0.20      |
| <sup>75</sup> As (μg/L)  | LOQ                  | LOQ                  | LOQ                  | LOQ                       | LOQ                  | LOQ                  | LOQ                  | LOQ                  | LOQ                  |
| <sup>9</sup> Be (μg/L)   | LOQ                  | 0.15 $\pm$ 0.07      | LOQ                  | 0.37 $\pm$ 0.22           | 0.73 $\pm$ 0.24      | 0.74 $\pm$ 0.10      | 4.36 $\pm$ 1.41      | 3.79 $\pm$ 1.64      | 3.24 $\pm$ 0.54      |
| <sup>209</sup> Bi (μg/L) | LOQ                  | LOQ                  | LOQ                  | LOQ                       | LOQ                  | 2.34 $\pm$ 0.11      | LOQ                  | 1.03 $\pm$ 0.35      | 1.99 $\pm$ 0.37      |
| <sup>133</sup> Cs (μg/L) | 2.33 $\pm$ 1.12      | 2.88 $\pm$ 0.56      | LOQ                  | 6.29 $\pm$ 4.77           | 7.07 $\pm$ 4.56      | 7.92 $\pm$ 4.06      | 8.24 $\pm$ 5.82      | 9.73 $\pm$ 6.03      | 10.41 $\pm$ 6.17     |
| <sup>137</sup> Ba (μg/L) | 80.56 $\pm$ 8.09     | 81.78 $\pm$ 22.19    | 104.63 $\pm$ 12.78   | 172.04 $\pm$ 18.48        | 211.81 $\pm$ 36.31   | 201.21 $\pm$ 30.76   | 501.66 $\pm$ 271.14  | 434.52 $\pm$ 246.28  | 499.22 $\pm$ 288.73  |
| <sup>70</sup> Ga (μg/L)  | 3.25 $\pm$ 1.76      | 5.12 $\pm$ 0.73      | 4.67 $\pm$ 2.09      | LOQ                       | LOQ                  | LOQ                  | 6.39 $\pm$ 3.86      | 4.96 $\pm$ 2.45      | 4.54 $\pm$ 2.30      |
| <sup>115</sup> In (μg/L) | LOQ                  | LOQ                  | LOQ                  | LOQ                       | LOQ                  | LOQ                  | LOQ                  | LOQ                  | LOQ                  |
| <sup>88</sup> Sr (μg/L)  | 212.17 $\pm$ 56.83   | 256.17 $\pm$ 10.76   | 238.28 $\pm$ 13.18   | 321.53 $\pm$ 34.32        | 289.55 $\pm$ 27.74   | 309.94 $\pm$ 58.30   | 552.88 $\pm$ 326.98  | 542.78 $\pm$ 303.43  | 566.97 $\pm$ 276.74  |
| <sup>85</sup> Rb (μg/L)  | 400.78 $\pm$ 50.24   | 340.44 $\pm$ 50.24   | 344.03 $\pm$ 109.11  | 487.34 $\pm$ 150.69       | 535.47 $\pm$ 214.51  | 579.48 $\pm$ 193.54  | 352.08 $\pm$ 155.65  | 412.62 $\pm$ 154.93  | 398.11 $\pm$ 209.66  |
| <sup>79</sup> Se (μg/L)  | 16.60 $\pm$ 6.02     | 28.42 $\pm$ 6.58     | 18.18 $\pm$ 3.45     | 11.06 $\pm$ 5.82          | 17.15 $\pm$ 6.82     | 10.05 $\pm$ 3.72     | 5.58 $\pm$ 3.25      | 9.70 $\pm$ 6.19      | 11.00 $\pm$ 4.43     |
| <sup>204</sup> Tl (μg/L) | 2.81 $\pm$ 0.52      | 2.82 $\pm$ 0.52      | 3.06 $\pm$ 0.84      | LOQ                       | LOQ                  | LOQ                  | 0.41 $\pm$ 0.09      | 0.70 $\pm$ 0.16      | 0.28 $\pm$ 0.03      |
| <sup>111</sup> Cd (μg/L) | LOQ                  | 0.15 $\pm$ 0.02      | 0.15 $\pm$ 0.04      | 0.10 $\pm$ 0.09           | 0.21 $\pm$ 0.04      | LOQ                  | 0.38 $\pm$ 0.10      | 2.00 $\pm$ 0.74      | 1.44 $\pm$ 0.30      |
| <sup>208</sup> Pb (μg/L) | LOQ                  | LOQ                  | LOQ                  | 53.97 $\pm$ 33.02         | 69.69 $\pm$ 37.69    | 56.21 $\pm$ 31.25    | 53.00 $\pm$ 21.74    | 59.19 $\pm$ 11.57    | 62.68 $\pm$ 11.30    |
| <sup>201</sup> Hg (μg/L) | LOQ                  | LOQ                  | LOQ                  | LOQ                       | LOQ                  | LOQ                  | LOQ                  | LOQ                  | LOQ                  |

| <sup>238</sup> U (µg/L)                                                                                                                                                                                                                                                                                                                                                                                                                                                                                                                                      | LOQ |
|--------------------------------------------------------------------------------------------------------------------------------------------------------------------------------------------------------------------------------------------------------------------------------------------------------------------------------------------------------------------------------------------------------------------------------------------------------------------------------------------------------------------------------------------------------------|-----|-----|-----|-----|-----|-----|-----|-----|-----|
| Average value ± standard deviation. M.P.L. (Maximum Permissible Limit) for Na 60 mg/L; M.P.L. for Cu 1 mg/L; M.P.L. for Zn 5 mg/L; M.P.L. for As 0.2 mg/L;<br>M.P.L. for Cd 0.01 mg/L; M.P.L. for Pb 0.15 mg/L. LOQ = Limit of Quantitation (lower than the limit of quantification); LOQ for As 0.7776 µg/L; LOQ for Be 0.0030 µg/L;<br>LOQ for Bi 0.0223 µg/L; LOQ for Cs 0.0040 µg/L; LOQ for Ga 0.035 µg/L; LOQ for In 0.010 µg/L; LOQ for Tl 0.006 µg/L; LOQ for Cd 0.067 µg/L; LOQ for Pb 0.0053 µg/L;<br>LOQ for Hg 0.137 µg/L; LOQ for U 0.084 µg/L. |     |     |     |     |     |     |     |     |     |

**Table S12. Concentration (Mean  $\pm$  standard deviation) of elements in wine samples from Huși and Drăgășani vineyards and Halmeu Wine Center**

| Location                 | Huși Vineyard        |                      |                     | Drăgășani Vineyard        |                     |                      | Halmeu Wine Center  |                     |                      |
|--------------------------|----------------------|----------------------|---------------------|---------------------------|---------------------|----------------------|---------------------|---------------------|----------------------|
| Element                  | Org                  | Conv                 | Home                | Org                       | Conv                | Home                 | Org                 | Conv                | Home                 |
| <sup>23</sup> Na (mg/L)  | 40.28 $\pm$ 3.76     | 39.04 $\pm$ 4.62     | 37.84 $\pm$ 8.61    | 39.23 $\pm$ 3.19          | 44.04 $\pm$ 11.04   | 35.93 $\pm$ 11.04    | 33.49 $\pm$ 9.48    | 34.46 $\pm$ 2.92    | 22.22 $\pm$ 1.28     |
| <sup>24</sup> Mg (mg/L)  | 102.28 $\pm$ 28.43   | 100.81 $\pm$ 30.07   | 97.35 $\pm$ 41.48   | 118.16 $\pm$ 57.04        | 124.91 $\pm$ 24.62  | 115.14 $\pm$ 31.45   | 96.95 $\pm$ 1.67    | 97.29 $\pm$ 2.64    | 111.86 $\pm$ 2.51    |
| <sup>43</sup> Ca (mg/L)  | 58.81 $\pm$ 20.79    | 67.11 $\pm$ 18.44    | 68.57 $\pm$ 22.70   | 57.46 $\pm$ 3.00          | 56.25 $\pm$ 9.12    | 52.33 $\pm$ 4.27     | 61.83 $\pm$ 4.19    | 59.88 $\pm$ 6.64    | 59.98 $\pm$ 6.46     |
| <sup>19</sup> K (mg/L)   | 399.09 $\pm$ 70.35   | 493.51 $\pm$ 180.35  | 500.29 $\pm$ 155.23 | 568.01 $\pm$ 449.60       | 547.39 $\pm$ 432.33 | 599.99 $\pm$ 371.57  | 270.96 $\pm$ 6.48   | 318.10 $\pm$ 18.20  | 272.56 $\pm$ 16.80   |
| <sup>7</sup> Li (μg/L)   | 17.62 $\pm$ 9.12     | 9.01 $\pm$ 2.09      | 8.87 $\pm$ 2.71     | 26.54 $\pm$ 18.98         | 24.49 $\pm$ 15.98   | 14.05 $\pm$ 3.29     | 7.52 $\pm$ 1.89     | 3.97 $\pm$ 1.67     | 4.38 $\pm$ 2.69      |
| <sup>64</sup> Cu (mg/L)  | 0.33 $\pm$ 0.14      | 0.51 $\pm$ 0.14      | 0.30 $\pm$ 0.08     | 0.44 $\pm$ 0.09           | 0.70 $\pm$ 0.18     | 0.58 $\pm$ 0.36      | 0.43 $\pm$ 0.05     | 0.49 $\pm$ 0.05     | 0.23 $\pm$ 0.11      |
| <sup>55</sup> Mn (mg/L)  | 0.49 $\pm$ 0.16      | 0.69 $\pm$ 0.19      | 0.68 $\pm$ 0.19     | 0.56 $\pm$ 0.23           | 0.64 $\pm$ 0.31     | 0.95 $\pm$ 0.47      | 0.58 $\pm$ 0.18     | 0.60 $\pm$ 0.04     | 0.71 $\pm$ 0.16      |
| <sup>56</sup> Fe (mg/L)  | 1.25 $\pm$ 0.41      | 2.87 $\pm$ 1.74      | 0.63 $\pm$ 0.18     | 1.78 $\pm$ 0.92           | 0.95 $\pm$ 0.31     | 0.73 $\pm$ 0.53      | 0.97 $\pm$ 0.02     | 2.26 $\pm$ 0.06     | 0.56 $\pm$ 0.06      |
| <sup>27</sup> Al (μg/L)  | 254.18 $\pm$ 104.73  | 368.07 $\pm$ 173.77  | 272.46 $\pm$ 50.65  | 272.92 $\pm$ 66.76        | 344.68 $\pm$ 93.86  | 289.55 $\pm$ 76.23   | 244.18 $\pm$ 6.58   | 537.87 $\pm$ 9.45   | 137.86 $\pm$ 12.76   |
| <sup>52</sup> Cr (μg/L)  | 528.68 $\pm$ 233.28  | 322.02 $\pm$ 8.31    | 295.77 $\pm$ 24.27  | 402.72 $\pm$ 31.78        | 318.11 $\pm$ 14.74  | 390.03 $\pm$ 112.10  | 383.96 $\pm$ 5.02   | 238.05 $\pm$ 3.33   | 451.93 $\pm$ 32.32   |
| <sup>59</sup> Co (μg/L)  | 7.56 $\pm$ 2.30      | 11.57 $\pm$ 4.30     | 10.04 $\pm$ 1.25    | 5.45 $\pm$ 1.14           | 6.78 $\pm$ 2.35     | 6.08 $\pm$ 4.09      | 5.40 $\pm$ 0.69     | 6.51 $\pm$ 0.76     | 9.85 $\pm$ 1.06      |
| <sup>60</sup> Ni (μg/L)  | 47.20 $\pm$ 27.79    | 36.72 $\pm$ 16.13    | 26.02 $\pm$ 4.93    | 68.06 $\pm$ 28.61         | 73.97 $\pm$ 3.32    | 49.44 $\pm$ 9.87     | 317.34 $\pm$ 3.45   | 328.83 $\pm$ 4.00   | 306.52 $\pm$ 16.16   |
| <sup>65</sup> Zn (mg/L)  | 1488.37 $\pm$ 257.76 | 2509.57 $\pm$ 461.96 | 2038.68 $\pm$ 57.50 | 2529.11 $\pm$ 632.48      | 2543.46 $\pm$ 5.96  | 2301.89 $\pm$ 945.15 | 2652.94 $\pm$ 64.94 | 3147.53 $\pm$ 20.46 | 3219.49 $\pm$ 218.58 |
| <sup>51</sup> V (μg/L)   | 459.72 $\pm$ 71.79   | 397.14 $\pm$ 122.75  | 371.54 $\pm$ 103.95 | 222.35 $\pm$ 98.73        | 224.77 $\pm$ 152.02 | 227.47 $\pm$ 92.67   | 213.38 $\pm$ 54.59  | 274.33 $\pm$ 39.15  | 276.27 $\pm$ 45.06   |
| <sup>108</sup> Ag (μg/L) | 2.41 $\pm$ 1.38      | 2.77 $\pm$ 1.07      | 1.66 $\pm$ 0.71     | 14.70 $\pm$ 70 $\pm$ 5.95 | 16.29 $\pm$ 3.53    | 14.53 $\pm$ 4.57     | 14.03 $\pm$ 4.14    | 20.69 $\pm$ 0.73    | 22.63 $\pm$ 2.44     |
| <sup>9</sup> Be (μg/L)   | 5.47 $\pm$ 1.10      | 5.72 $\pm$ 1.62      | 4.08 $\pm$ 1.34     | LOQ                       | LOQ                 | LOQ                  | LOQ                 | LOQ                 | LOQ                  |
| <sup>209</sup> Bi (μg/L) | 2.12 $\pm$ 1.75      | 0.22 $\pm$ 0.05      | 2.27 $\pm$ 0.37     | LOQ                       | LOQ                 | 0.94 $\pm$ 0.12      | 2.18 $\pm$ 0.18     | 1.04 $\pm$ 0.17     | 140 $\pm$ 0.17       |
| <sup>133</sup> Cs (μg/L) | 9.23 $\pm$ 1.72      | 6.66 $\pm$ 2.12      | 8.13 $\pm$ 0.98     | LOQ                       | LOQ                 | LOQ                  | LOQ                 | LOQ                 | LOQ                  |
| <sup>137</sup> Ba (μg/L) | 412.45 $\pm$ 148.18  | 434.15 $\pm$ 118.00  | 310.87 $\pm$ 124.84 | 196.21 $\pm$ 101.51       | 239.01 $\pm$ 130.50 | 220.67 $\pm$ 88.18   | 191.66 $\pm$ 27.03  | 208.41 $\pm$ 8.34   | 203.08 $\pm$ 13.47   |
| <sup>70</sup> Ga (μg/L)  | 2.89 $\pm$ 1.02      | 2.66 $\pm$ 0.84      | 3.35 $\pm$ 0.83     | LOQ                       | LOQ                 | LOQ                  | 2.11 $\pm$ 0.22     | 3.22 $\pm$ 1.83     | 2.73 $\pm$ 1.64      |
| <sup>88</sup> Sr (μg/L)  | 498.83 $\pm$ 53.30   | 575.19 $\pm$ 75.50   | 534.26 $\pm$ 116.50 | 462.78 $\pm$ 341.90       | 502.03 $\pm$ 274.21 | 539.42 $\pm$ 241.32  | 965.22 $\pm$ 48.89  | 748.85 $\pm$ 390.58 | 960.15 $\pm$ 44.62   |
| <sup>85</sup> Rb (μg/L)  | 631.41 $\pm$ 123.89  | 677.23 $\pm$ 163.30  | 621.34 $\pm$ 162.94 | 643.58 $\pm$ 324.20       | 755.31 $\pm$ 227.52 | 773.08 $\pm$ 187.97  | 476.93 $\pm$ 58.05  | 392.30 $\pm$ 44.18  | 365.78 $\pm$ 79.30   |
| <sup>79</sup> Se (μg/L)  | 10.58 $\pm$ 4.87     | 15.34 $\pm$ 3.00     | 14.03 $\pm$ 4.39    | 2.85 $\pm$ 1.85           | 3.26 $\pm$ 1.61     | 2.15 $\pm$ 0.44      | 3.08 $\pm$ 1.28     | 4.30 $\pm$ 1.01     | 5.86 $\pm$ 2.77      |
| <sup>204</sup> Tl (μg/L) | 1.89 $\pm$ 2.34      | 2.20 $\pm$ 0.98      | 1.89 $\pm$ 0.10     | 0.59 $\pm$ 0.64           | 0.42 $\pm$ 0.07     | 0.28 $\pm$ 0.11      | LOQ                 | LOQ                 | LOQ                  |
| <sup>111</sup> Cd (μg/L) | 0.13 $\pm$ 0.17      | 0.27 $\pm$ 0.19      | 0.22 $\pm$ 0.04     | LOQ                       | LOQ                 | LOQ                  | 0.22 $\pm$ 0.07     | 0.32 $\pm$ 0.04     | 0.19 $\pm$ 0.07      |
| <sup>208</sup> Pb (μg/L) | 19.89 $\pm$ 3.61     | 40.48 $\pm$ 12.23    | 11.29 $\pm$ 12.38   | 26.48 $\pm$ 7.91          | 26.76 $\pm$ 6.64    | 24.51 $\pm$ 9.98     | 27.10 $\pm$ 4.57    | 35.21 $\pm$ 2.96    | 35.09 $\pm$ 7.38     |

Average value  $\pm$  standard deviation. M.P.L. (Maximum Permissible Limit) for Na 60 mg/L; M.P.L. for Cu 1 mg/L; M.P.L. for Zn 5 mg/L; M.P.L. for As 0.2 mg/L; M.P.L. for Cd 0.01 mg/L; M.P.L. for Pb 0.15 mg/L. LOQ = Limit of Quantitation (lower than the limit of quantification); LOQ for As 0.7776 μg/L; LOQ for Be 0.0030 μg/L; LOQ for Bi

0.0223 µg/L; LOQ for Cs 0.0040 µg/L; LOQ for Ga 0.035 µg/L; LOQ for In 0.010 µg/L; LOQ for Tl 0.006 µg/L; LOQ for Cd 0.067 µg/L; LOQ for Pb 0.0053 µg/L; LOQ for Hg 0.137 µg/L; LOQ for U 0.084 µg/L.

**Table S13. The mean and median value in wine samples from all vineyards of estimated dietary intake (EDI) (mg/kg birth weight per day) based on a 250 mL (0.25 L) wine per day per capita consumption (average values)**

| Location / Vineyard | N  | EDI <sup>23</sup> Na | EDI <sup>24</sup> Mg | EDI <sup>43</sup> Ca | EDI <sup>7</sup> Li | EDI <sup>7</sup> Li | EDI <sup>65</sup> Zn |
|---------------------|----|----------------------|----------------------|----------------------|---------------------|---------------------|----------------------|
| Dealu Bujorului     | 43 | 0.14                 | 0.42                 | 0.20                 | 2.15                | 0.05                | 0.01                 |
| Târnava             | 36 | 0.20                 | 0.39                 | 0.16                 | 1.06                | 0.03                | 0.01                 |
| Murfatlar           | 33 | 0.20                 | 0.34                 | 0.19                 | 1.89                | 0.04                | 0.01                 |
| Cotnari             | 33 | 0.14                 | 0.45                 | 0.27                 | 0.93                | 0.05                | 0.01                 |
| Sarica Niculițel    | 33 | 0.13                 | 0.35                 | 0.14                 | 1.73                | 0.04                | 0.01                 |
| Panciu              | 17 | 0.13                 | 0.27                 | 0.18                 | 2.26                | 0.05                | 0.01                 |
| Huși                | 11 | 0.14                 | 0.36                 | 0.23                 | 1.66                | 0.04                | 0.01                 |
| Drăgășani           | 12 | 0.14                 | 0.28                 | 0.19                 | 1.39                | 0.04                | 0.01                 |
| Halmeu              | 17 | 0.11                 | 0.36                 | 0.22                 | 1.03                | 0.02                | 0.01                 |

**Table S14. The mean and median value in wine samples from all vineyards of estimated target hazard quotients (THQ) based on a 250 mL (0.25 L) wine per day per capita consumption (average values)**

| Location / Vineyard | N  | THQ <sup>7</sup> Li | THQ <sup>64</sup> Cu | THQ <sup>55</sup> Mn | THQ <sup>56</sup> Fe | THQ <sup>27</sup> Al | THQ <sup>59</sup> Co | THQ <sup>60</sup> Ni |
|---------------------|----|---------------------|----------------------|----------------------|----------------------|----------------------|----------------------|----------------------|
| Dealu Bujorului     | 43 | 0.02                | 0.03                 | 0.08                 | 0.01                 | 0.001                | 0.09                 | 0.01                 |
| Târnava             | 36 | 0.02                | 0.05                 | 0.05                 | 0.005                | 0.001                | 0.05                 | 0.01                 |
| Murfatlar           | 33 | 0.02                | 0.04                 | 0.03                 | 0.05                 | 0.002                | 0.05                 | 0.005                |
| Cotnari             | 33 | 0.02                | 0.03                 | 0.06                 | 0.01                 | 0.002                | 0.05                 | 0.01                 |
| Sarica Niculițel    | 33 | 0.02                | 0.06                 | 0.10                 | 0.01                 | 0.001                | 0.05                 | 0.01                 |
| Panciu              | 17 | 0.02                | 0.03                 | 0.08                 | 0.004                | 0.002                | 0.05                 | 0.01                 |
| Huși                | 11 | 0.02                | 0.03                 | 0.09                 | 0.01                 | 0.001                | 0.11                 | 0.01                 |
| Drăgășani           | 12 | 0.04                | 0.05                 | 0.10                 | 0.01                 | 0.001                | 0.07                 | 0.01                 |
| Halmeu              | 17 | 0.01                | 0.03                 | 0.09                 | 0.01                 | 0.001                | 0.08                 | 0.05                 |

  

| Location / Vineyard | N  | THQ <sup>65</sup> Zn | EDI <sup>51</sup> V | THQ <sup>108</sup> Ag | THQ <sup>137</sup> Ba | THQ <sup>88</sup> Sr | THQ <sup>111</sup> Cd |
|---------------------|----|----------------------|---------------------|-----------------------|-----------------------|----------------------|-----------------------|
| Dealu Bujorului     | 43 | 0.03                 | 0.10                | N/A                   | 0.004                 | 0.004                | 0.001                 |
| Târnava             | 36 | 0.04                 | 0.45                | N/A                   | 0.003                 | 0.004                | 0.001                 |
| Murfatlar           | 33 | 0.02                 | 0.13                | N/A                   | 0.002                 | 0.003                | 0.003                 |
| Cotnari             | 33 | 0.04                 | 0.15                | 0.002                 | 0.002                 | 0.001                | 0.001                 |
| Sarica Niculițel    | 33 | 0.02                 | 0.17                | N/A                   | 0.003                 | 0.002                | N/A                   |
| Panciu              | 17 | 0.04                 | 0.06                | N/A                   | 0.008                 | 0.003                | 0.004                 |
| Huși                | 11 | 0.01                 | 0.28                | 0.001                 | 0.007                 | 0.003                | 0.001                 |
| Drăgășani           | 12 | 0.03                 | 0.16                | 0.01                  | 0.004                 | 0.003                | N/A                   |
| Halmeu              | 17 | 0.03                 | 0.18                | 0.01                  | 0.003                 | 0.005                | 0.001                 |
